# Supplementary material for: Pilot study: Evaluation of the referral pathway to Problem Management Plus (PM+) in Nakuru County, Kenya: GBV survivors’ and stakeholders’ statement: A tale of PM+
Source: Research Square preprint supplement (doi:10.21203/rs.3.rs-6604618/v1), 2025-06-16
Supplement: Supplementary file 2 [file 42f3c6c32d431adacea98777.pdf]

# Interview guide in-depth interviews

## Interview guide for in-depth interview

*Target group: Clients who have completed PM+ within the last 3 months.*

The in-depth interviews will be in collaboration with MIDRIFT. MIDRIFT is a Human Rights organization that

implements projects on Peace, Safety and Security in Nakuru. The purpose of this interview is to assess

your experiences in the referral to and/or from PM+ services. Please note the responses you provide will be recorded for reporting purposes only and once reported they will be deleted immediately. A psychologist will be present in the interviews to support you in case you experience any trauma before,

during and after participating in this interview. Note that you are free to withdraw at any time and no penalty will be applied. This interview will take approximately 45 minutes.

### **SECTION A: DEMOGRAPHIC DATA**

1. Name
2. Age
3. Occupation
4. The length of time in the PM+ intervention,
5. Marital status
6. Number of children.

### **SECTION B: KNOWLEDGE OF PM+**

1. Did you have any knowledge or understanding about PM+ before being introduced to it?
2. How did you learn about the program? Who introduced you to PFA?
3. How has PM+ helped you to have the life they have today?
4. Were there specific sessions of PM+ that you found very helpful? Please elaborate
5. How did you experience PM+ in general?

### **SECTION C: PERCEPTION ABOUT THE REFERRAL PROCESS**

1. Please walk me through the process you underwent in referral
2. How was your interaction with the PFA provider? How would you describe it?
3. How was your interaction with the PM+ provider? How would you describe it?
4. What do you think? Were there any factors which made the referral to the PM+ program easier?  
How would you describe it?
5. What about the possible factors which made the referral to the PM+ program more difficult?
6. Any suggestions as to how the referral to the PM+ program can be better?

### **SECTION D: REFERRAL TO MENTAL HEALTH SERVICES**

1. Looking at Mental Health Services in Nakuru, are there any challenges affecting access to these services by people in your community?
2. What are some of the challenges influencing efficient referral to mental health services in Nakuru?
3. What recommendations would you give to stakeholders/practitioners involved with the provision of mental health services?
